# Supplementary material
Source: publisher figshare collection journal article supplement (https://frontiersin.figshare.com/ndownloader/files/29607366)
Supplement: Supplementary file 1 [file 29607366]

**Supplementary Information for “Changes in bacterial communities and treatment of municipal wastewater in arctic wastewater stabilization ponds”**

Yannan Huang, Colin M. Ragush, Lindsay H. Johnston, Michael W. Hall, Robert G. Beiko, Rob C. Jamieson, Lisbeth Truelstrup Hansen*





**Figure S1.** Dissolved oxygen (DO) in the wastewater stabilization ponds in Pond Inlet (a, b) and Clyde River (c, d) during the summer treatment seasons of 2013 and 2014.

**
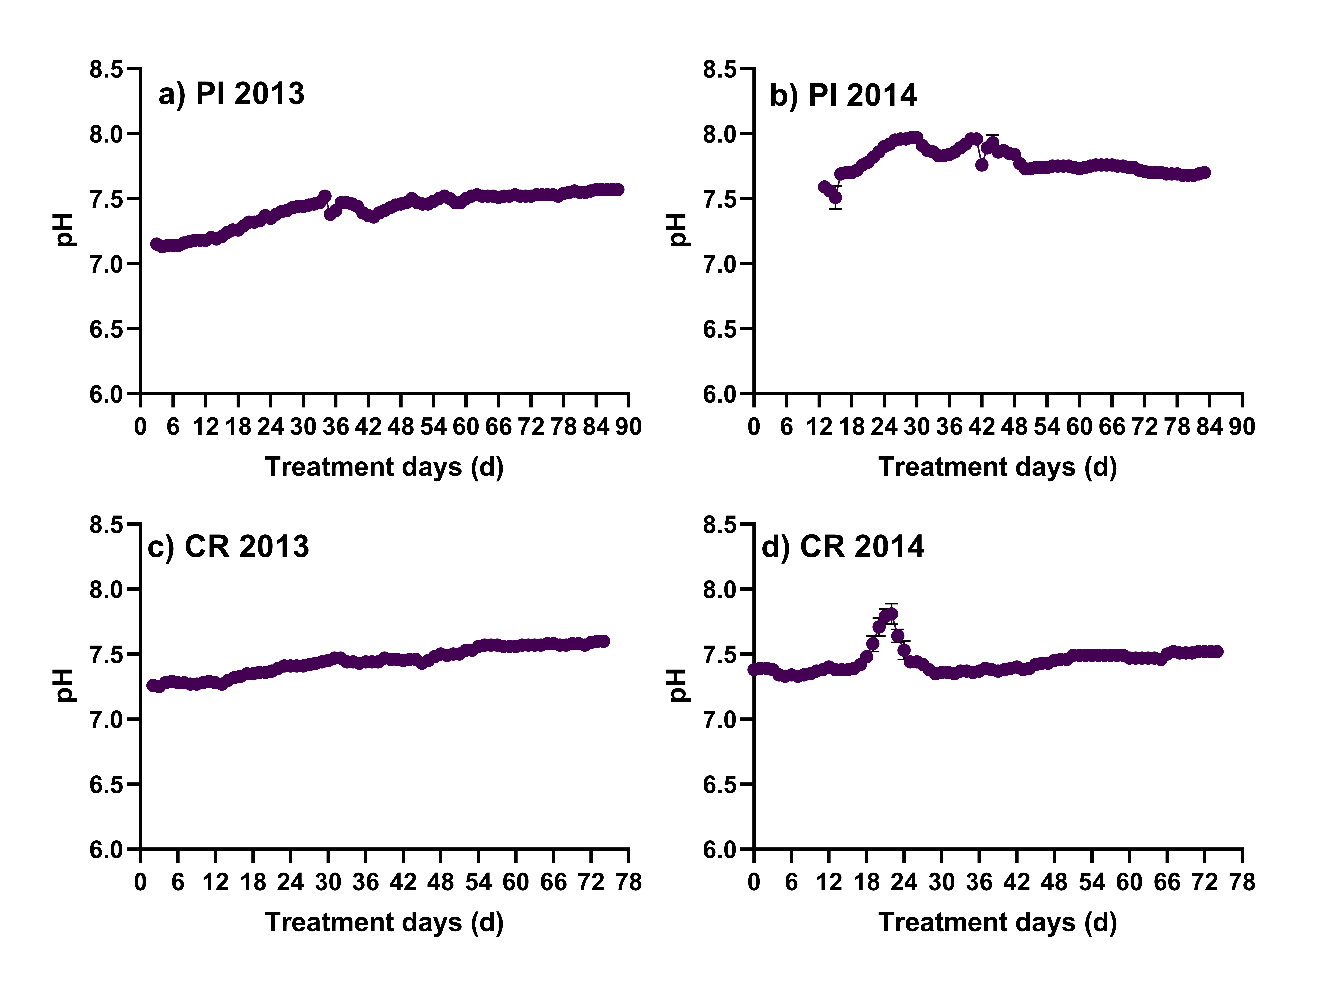
**

**Figure S2.** pH in the wastewater stabilization ponds in Pond Inlet (a, b) and Clyde River (c, d) during the summer treatment seasons of 2013 and 2014.

**Figure S3.** Genus-level composition of the core microbiome in all raw wastewater samples (n=34 in total) obtained from Pond Inlet (PI) and Clyde River (CR) over the 2012-2014 summer treatment seasons. Legend: B – Beginning, M – Middle, E – End of summer treatment season. -12, -13 and -14 indicate 2012, 2013 and 2014 sampling years, respectively. Uncl: unclassified. Other (<10%) represented the bacterium including the unclassified with its relative abundance less than 10% was pooled into one group. The relative abundance of each genus for each treatment season was presented as the mean value of the number of raw wastewater samples collected.

**Figure S4.** Genus-level composition and distribution of bacterial communities along the one-cell WSP process in Pond Inlet during the end of 2014 summer treatment season. Uncl: unclassified. Other (<10%) indicated that the bacteria genus including the unclassified with its relative abundance less than 10% was grouped into one bin. The relative abundance of each bacterial genus for each sample type was presented as the mean value of the number of samples collected, except sludge sample (only one composite sample was collected in the end of sampling event in 2014).

a)

b)

**Figure S5.** Distribution, composition, and phylogenetic beta diversity of bacterial communities along the two-cell WSP treatment train in Clyde River in September 2014. (a) Change in relative abundance of bacterial families (top 12 of 269 families) in wastewater samples collected along the treatment process. Legend for the list of abundant bacterial families with the phylum and class names listed in brackets. Other: sum of bacterial families with relative abundances <10%. (b) PCoA plot of the phylogenetic beta diversity (weighted UniFrac metric) of bacterial communities along the treatment process.
